# Supplementary material for: Novel solid-state synthesis of surfactant- and solvent-free Pd tetrahedron nanocatalysts
Source: Royal Society of Chemistry journal article supplement (doi:10.1039/d3ta06056j), 2023-12-07
Supplement: d3ta06056j1.pdf [file d3ta06056j1.pdf]

## Novel solid-state synthesis of surfactant- and solvent-free Pd tetrahedron nanocatalysts

Kyung Hee Oh<sup>a,b</sup>, Kwangsoo Kim<sup>c</sup>, Jin Gyu Lee<sup>a</sup>, Nahyun Park<sup>a</sup>, Hack-Keun Lee<sup>a</sup>, Shin Wook Kang<sup>a</sup>, Jung-Il Yang<sup>a</sup>, Byeong-Seon An<sup>d</sup>, Kang Hyun Park<sup>e</sup>, Chang Seop Hong<sup>b,\*</sup>, Byung-Hyun Kim<sup>f,g,\*</sup>, and Ji Chan Park<sup>a,h,\*</sup>

<sup>a</sup> Clean Fuel Laboratory, Korea Institute of Energy Research, Daejeon, 34129, Korea. E-mail:

jcpark@kier.re.kr

<sup>b</sup> Department of Chemistry, Korea University, Seoul 02841, Korea.

<sup>c</sup> Energy AI & Computational Science Laboratory, Korea Institute of Energy Research, Daejeon, 34129, Korea.

<sup>d</sup> Analysis Center for Energy Research, Korea Institute of Energy Research, Daejeon 34129, Korea.

<sup>e</sup> Department of Chemistry and Chemistry Institute for Functional Materials, Pusan National University, Busan 46241, Korea

<sup>f</sup> Department of Chemical and Molecular Engineering, Hanyang University ERICA, Ansan 15588, Korea.

<sup>g</sup> Department of Applied Chemistry, Center for Bionano Intelligence Education and Research, Hanyang University ERICA, Ansan 15588, Korea.

<sup>h</sup> Energy Engineering, University of Science and Technology, Daejeon, 34113, Korea.

E-mail: cshong@korea.ac.kr (C. S. Hong), bhkim00@hanyang.ac.kr (B.-H. Kim), and jcpark@kier.re.kr

(J. C. Park)

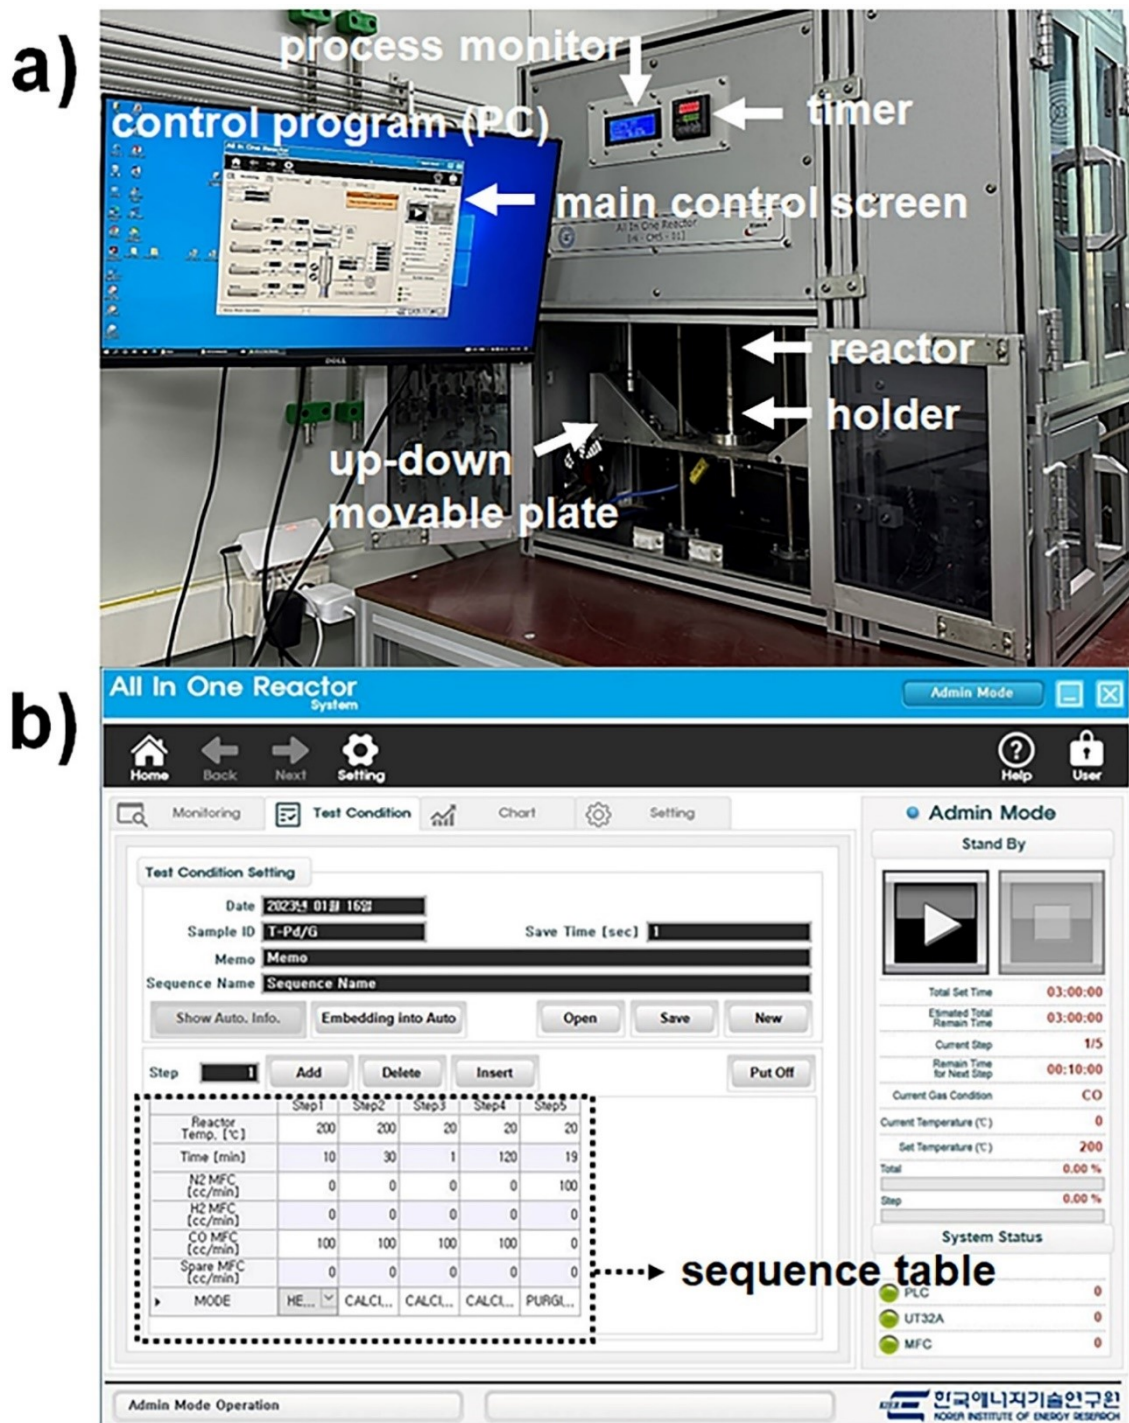

**Figure S1.** (a) A picture of the AIO reactor system and (b) the sequence table for T-Pd/G in the software program.

All In One Reactor System

Admin Mode

Home Back Next Setting Help User

Monitoring Test Condition Chart Setting

**Test Condition Setting**

Date: 2023년 08월 23일  
 Sample ID: Fe3O4/G Save Time [sec]: 1  
 Memo: Memo  
 Sequence Name: Sequence Name

Show Auto. Info. Embedding into Auto Open Save New

Step: 4 Add Delete Insert Put Off

|                             | Step1    | Step2    | Step3    | Step4    | Step5    |
|-----------------------------|----------|----------|----------|----------|----------|
| Reactor Temp. [°C]          | 400      | 400      | 20       | 20       | 20       |
| Time [min]                  | 10       | 30       | 1        | 120      | 19       |
| N <sub>2</sub> MFC [cc/min] | 100      | 100      | 100      | 100      | 100      |
| H <sub>2</sub> MFC [cc/min] | 0        | 0        | 0        | 0        | 0        |
| CO MFC [cc/min]             | 0        | 0        | 0        | 0        | 0        |
| Spare MFC [cc/min]          | 0        | 0        | 0        | 0        | 0        |
| MODE                        | HEATL... | CALCL... | CALCL... | CALCL... | PURGI... |

-----> sequence table

**Admin Mode**

Stand By

Total Set Time: 03:00:00  
 Estimated Total Remain Time: 03:00:00  
 Current Step: 1/5  
 Remain Time for Next Step: 00:10:00  
 Current Gas Condition: N<sub>2</sub>  
 Current Temperature (°C): 59.3  
 Set Temperature (°C): 400  
 Total: 0.00 %  
 Step: 0.00 %

**System Status**

- PLC: 0
- UT32A: 0
- MFC: 0

Admin Mode Operation

KIER 한국에너지기술연구원 KOREA INSTITUTE OF ENERGY RESEARCH

Figure S2. Sequence table for Fe<sub>3</sub>O<sub>4</sub>-G synthesis in the software program of the AIO reactor system.

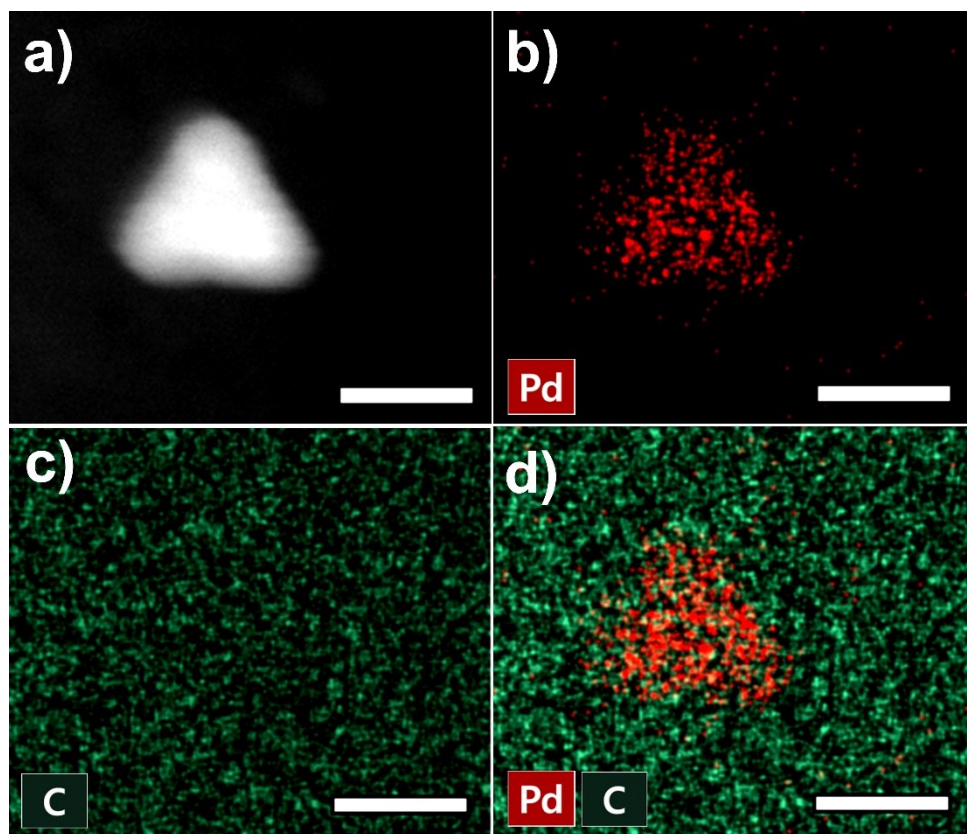

**Figure S3.** (a) HAADF-TEM image and (b-d) elemental mapping images of single Pd nanoparticle in T-Pd/G. All bars represent 10 nm.

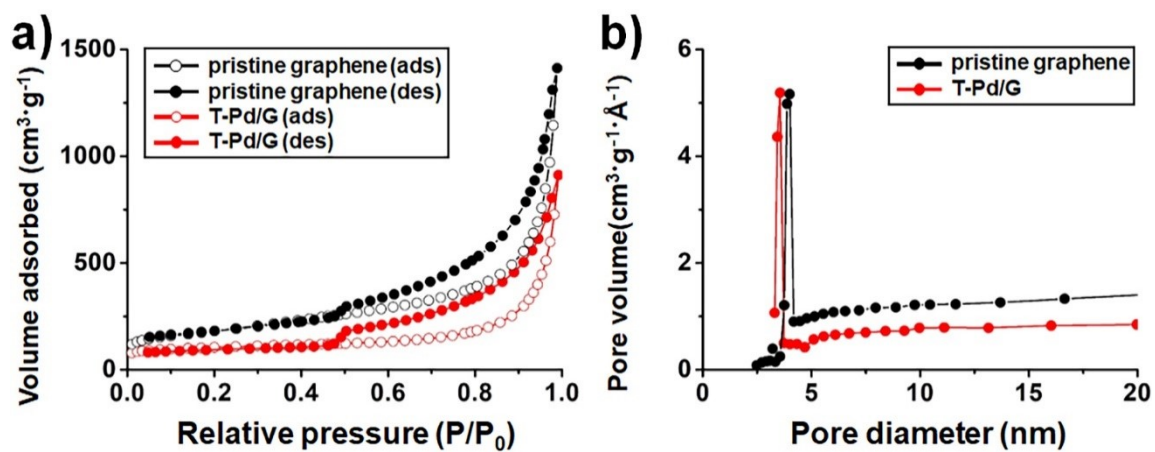

**Figure S4.** (a)  $\text{N}_2$  sorption isotherms and (b) pore size distribution diagrams by desorption branches of pristine graphene and T-Pd/G.

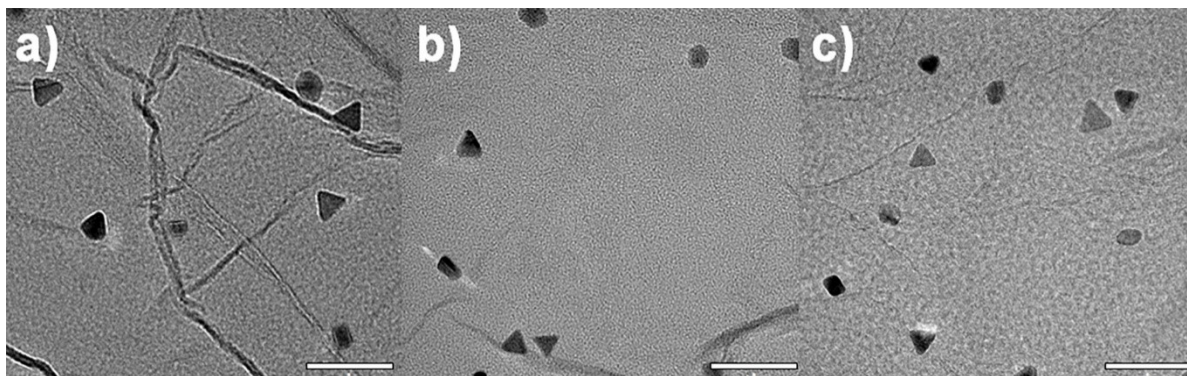

**Figure S5.** (a-c) TEM images of the T-Pd/G at different batches. All bars represent 50 nm.



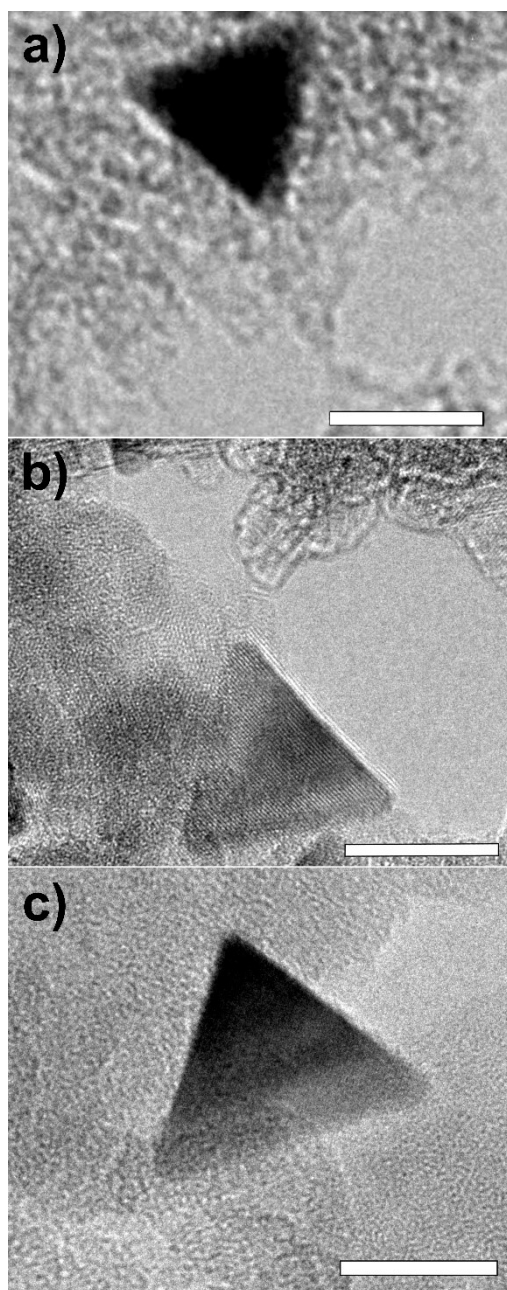

**Figure S6.** HRTEM images of (a) T-Pd/AC, (b) T-Pd/Al<sub>2</sub>O<sub>3</sub>, and (c) T-Pd/SiO<sub>2</sub>. All bars represent 10 nm.

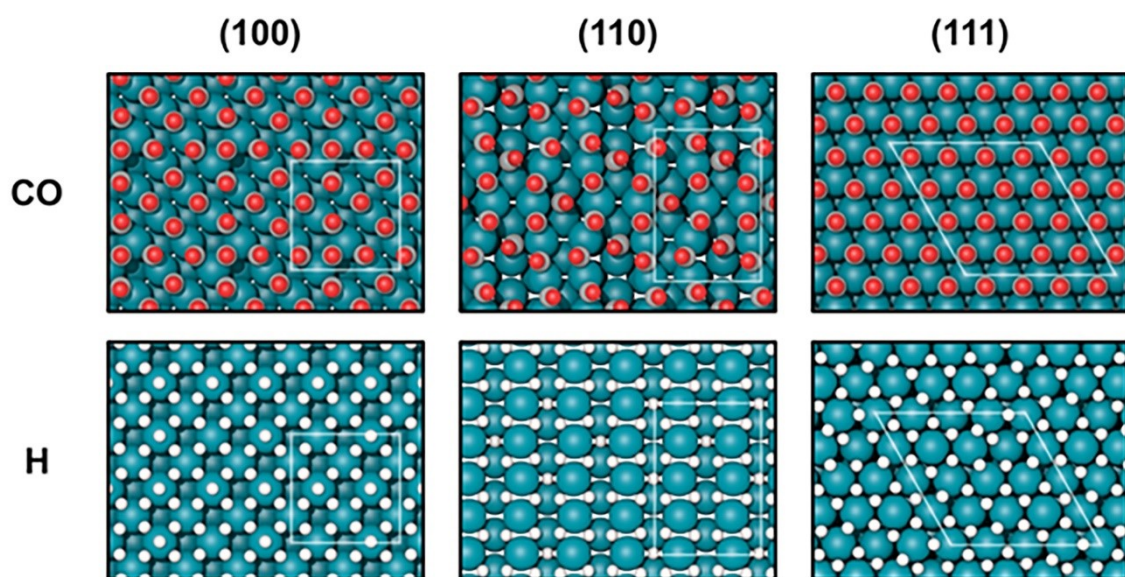

**Figure S7.** Atomic configurations of Pd slab models with full coverage of molecules.

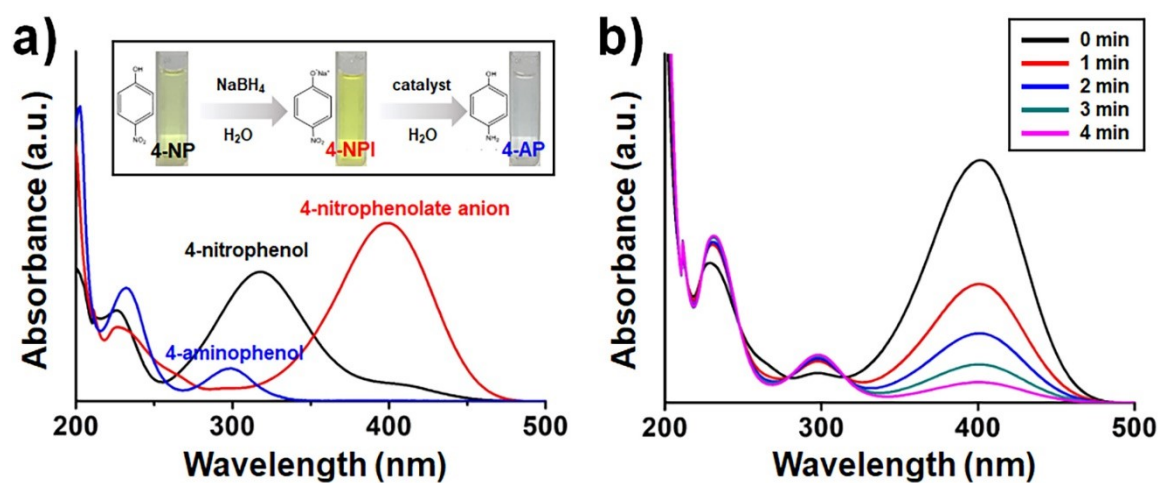

**Figure S8.** (a) UV-vis spectra and photographs of 4-nitrophenol (4-NP), 4-nitrophenolate anion (4-NPI), and 4-aminophenol (4-AP). (b) UV-vis spectra of the catalytic 4-NP reduction reaction at 30 °C for 4 min using T-Pd/G catalyst.



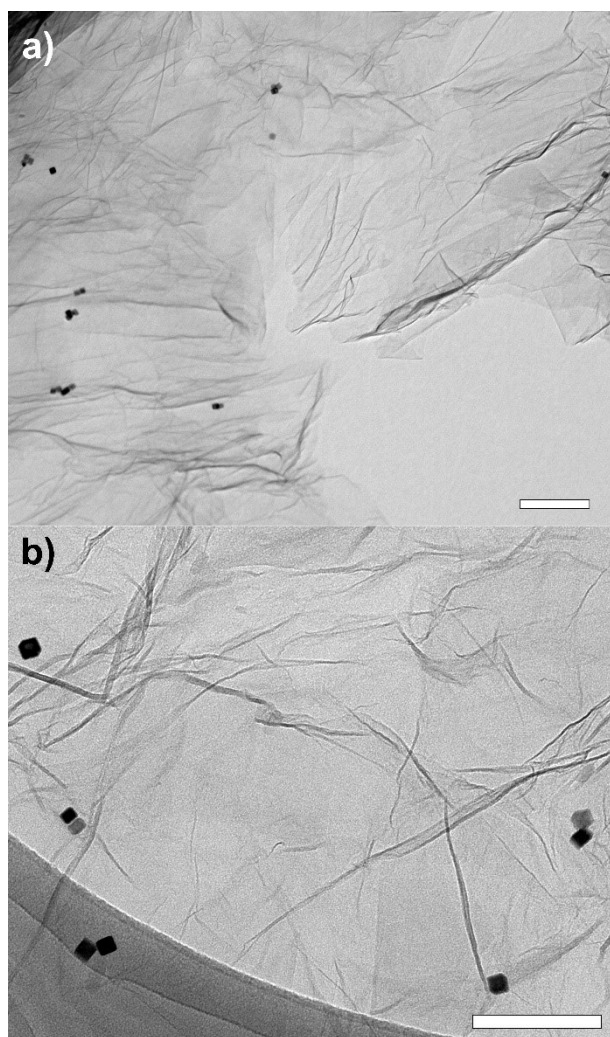

**Figure S9.** (a,b) Low-resolution TEM images of C-Pd/G. The bars represent 200 nm (a) and 100 nm (b).

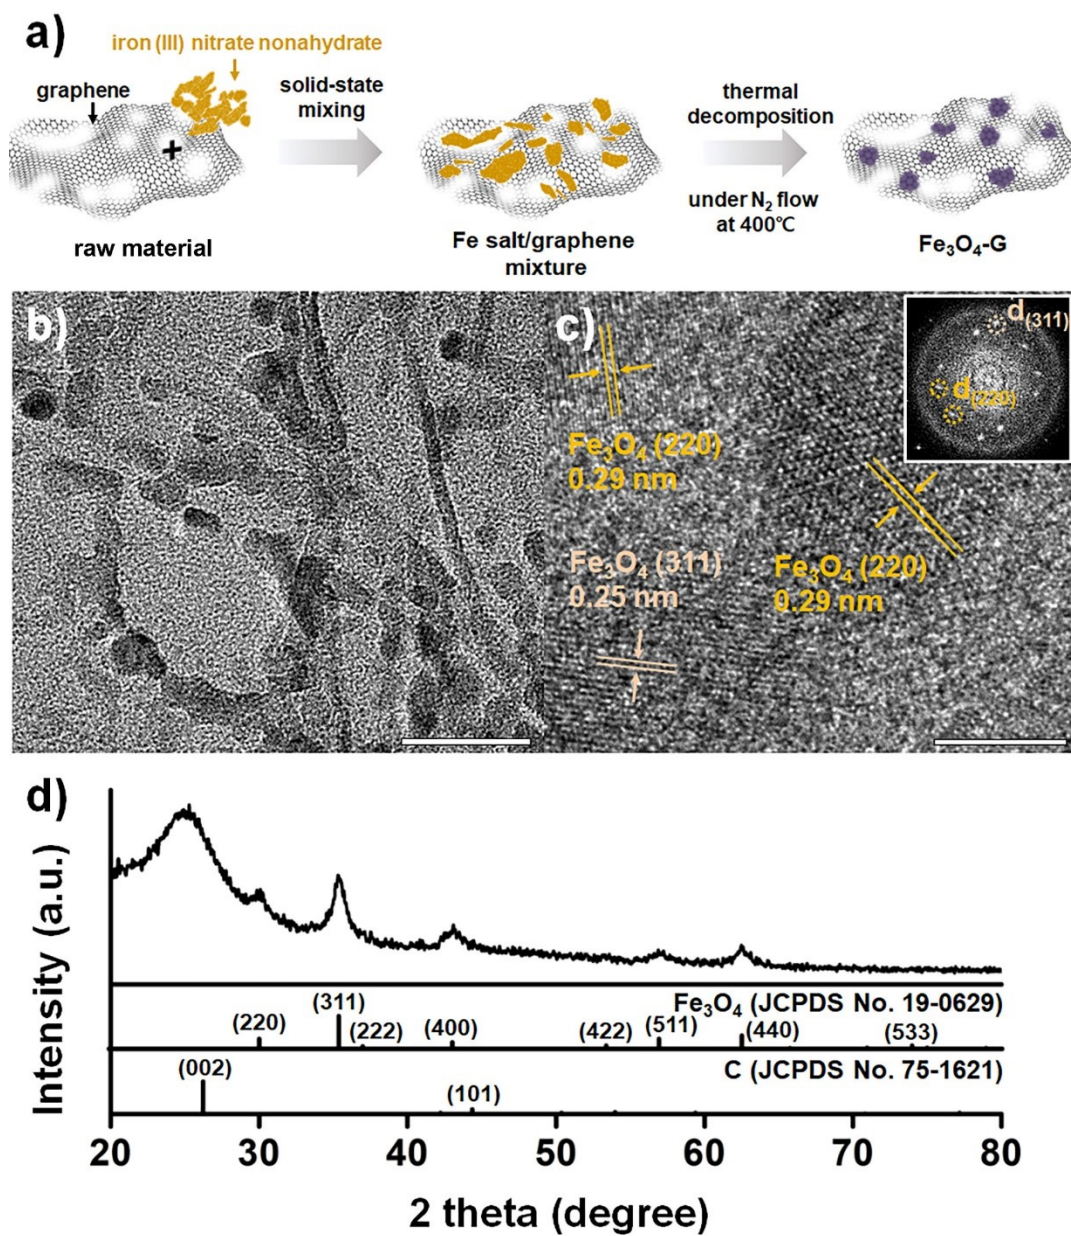

**Figure S10.** (a) A brief scheme of magnetically separable Fe<sub>3</sub>O<sub>4</sub>-G support. (b) TEM image, (c) HRTEM image with the corresponding FT pattern (inset of c), (d) XRD spectrum of Fe<sub>3</sub>O<sub>4</sub>-G. The bars represent 50 nm (b) and 5 nm (c), respectively.

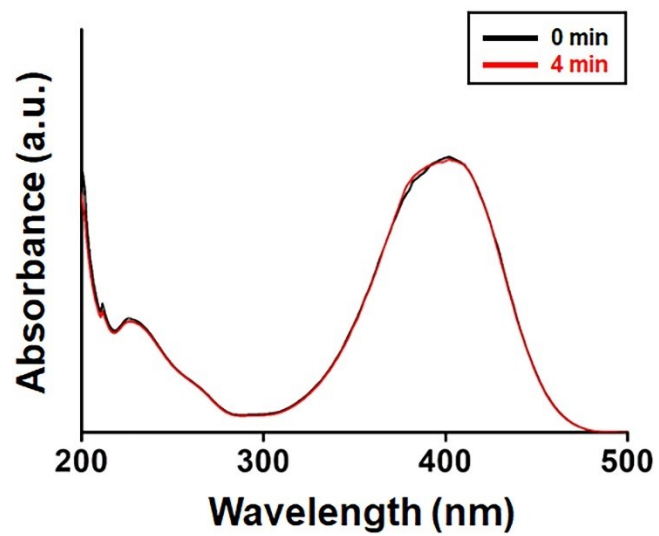

**Figure S11.** UV-vis spectra by the 4-NP reduction reaction at the initial point (0 min) and after reaction (4 min) using  $\text{Fe}_3\text{O}_4\text{-G}$  at 30 °C.

**Table S1.** Comparison of the lattice constant of Pd with those in the recently reported literature.

| Method  | Lattice constant (Å) | Ref.      |
|---------|----------------------|-----------|
| GGA-PBE | 3.94                 | This work |
| GGA-PBE | 3.98                 | [1]       |
| GGA-PBE | 3.95                 | [2]       |
| EXPT    | 3.88                 | [3]       |
| EXPT    | 3.89                 | [4]       |

**Table S2.** Comparison of the surface energy of the low-index Pd slab model with those found in the

| Method  | Surface energy (J·m <sup>-2</sup> ) |       |       | Ref.      |
|---------|-------------------------------------|-------|-------|-----------|
|         | (100)                               | (110) | (111) |           |
| GGA-PBE | 1.54                                | 1.58  | 1.30  | This work |
| GGA-PBE | 1.54                                | 1.60  | 1.36  | [5]       |
| GGA-PBE | 1.49                                | 1.55  | 1.31  | [2]       |
| GGA-PBE | 1.51                                | 1.60  | 1.33  | [6]       |

literature.

**Table S3.** The adsorption energies of CO and H on different Pd facets calculated for both a single molecule and at full coverage.

| Molecule | Facet | # of adsorbate     | Adsorption energy (eV) |
|----------|-------|--------------------|------------------------|
| CO       | (100) | 1                  | -1.86                  |
|          |       | 9 (full coverage)  | -0.74                  |
|          | (110) | 1                  | -1.88                  |
|          |       | 11 (full coverage) | -0.99                  |
|          | (111) | 1                  | -2.03                  |
|          |       | 16 (full coverage) | -0.85                  |
| H        | (100) | 1                  | -0.48                  |
|          |       | 19 (full coverage) | -0.02                  |
|          | (110) | 1                  | -0.50                  |
|          |       | 19 (full coverage) | -0.22                  |
|          | (111) | 1                  | -0.58                  |
|          |       | 27 (full coverage) | -0.06                  |



**Table S4.** Rate constant data for each catalyst in 4-NP reduction at different reaction temperatures.

| Catalyst        | Reaction conditions                                                | Temperature (°C) | Rate constant $k$ ( $\times 10^{-3} \cdot \text{s}^{-1}$ ) |
|-----------------|--------------------------------------------------------------------|------------------|------------------------------------------------------------|
| T-Pd/G          | Catalyst amount: 2.0 mg<br>C/N ratio = 2.0<br>reaction time: 4 min | 5                | 6.4                                                        |
|                 |                                                                    | 10               | 7.2                                                        |
|                 |                                                                    | 20               | 9.2                                                        |
|                 |                                                                    | 30               | 10.1                                                       |
|                 |                                                                    | 40               | 11.2                                                       |
|                 |                                                                    | 50               | 15.3                                                       |
| S-Pd/G          |                                                                    | 5                | 3.4                                                        |
|                 |                                                                    | 10               | 3.6                                                        |
|                 |                                                                    | 20               | 5.0                                                        |
|                 |                                                                    | 30               | 6.2                                                        |
|                 |                                                                    | 40               | 8.0                                                        |
|                 |                                                                    | 50               | 9.5                                                        |
| commercial Pd/C |                                                                    | 5                | 1.0                                                        |
|                 |                                                                    | 10               | 1.2                                                        |
|                 |                                                                    | 20               | 1.8                                                        |
|                 |                                                                    | 30               | 2.9                                                        |
|                 |                                                                    | 40               | 4.2                                                        |
|                 |                                                                    | 50               | 5.9                                                        |

\*C/N ratio = used catalyst weight (g)/4-NP (mol).

**Table S5.** Comparison of rate constant and activation energies of Pd-based catalysts found in the literature for catalysts used in 4-NP reduction.

| Catalyst               | Reaction condition                                                                                 | Rate constant<br>$k$ ( $\times 10^{-3} \cdot s^{-1}$ ) | $E_a$ ( $kJ \cdot mol^{-1}$ ) | Ref.      |
|------------------------|----------------------------------------------------------------------------------------------------|--------------------------------------------------------|-------------------------------|-----------|
| T-Pd/G                 |                                                                                                    | 10.12                                                  | 13.2                          |           |
| S-Pd/G                 | Catalyst amount: 2.0 mg<br>C/N ratio = 2.0<br>reaction time: 4 min<br>reaction temp.: 30 °C        | 6.23                                                   | 17.8                          | This work |
| commercial Pd/C        |                                                                                                    | 2.90                                                   | 30.3                          |           |
| Pd NPs                 | Catalyst amount: 1.3 $\mu$ g<br>C/N ratio = 3.3<br>reaction time: 6 min<br>reaction temp.: 25 °C   | 8.7                                                    | 14.1                          | [7]       |
| PEI-Pd24               | Catalyst amount: 20 mg<br>C/N ratio = 166.7<br>reaction time: 13 min<br>reaction temp.: room temp. | 4                                                      | 35.3                          | [8]       |
| Pd/BGO                 | Catalyst amount: 50 mg<br>C/N ratio = 5<br>reaction time: 2 min<br>reaction temp.: room temp.      | 52                                                     | 37.2                          | [9]       |
| Pd/GNS-NH <sub>2</sub> | Catalyst amount: 5.0 mg<br>C/N ratio = 250<br>reaction time: 1 min<br>reaction temp.: room temp.   | N.A.                                                   | 20.8                          | [10]      |
| Pd/NCB                 | Catalyst amount: 85 $\mu$ g<br>C/N ratio = 1.8<br>Reaction time: 6 min<br>reaction temp.: 30 °C    | 6.4                                                    | 38.9                          | [11]      |
| Pd-1                   | Catalyst amount: 1.3 $\mu$ g<br>C/N ratio = 3.3<br>reaction time: 6 min<br>reaction temp.: 25 °C   | 8.57                                                   | 22.2                          | [12]      |
| Pd nanocubes           | Catalyst amount: 2.4 mg<br>C/N ratio = 750<br>reaction time: 45 min<br>reaction temp.: 30 °C       | 0.52                                                   | 94.6                          | [13]      |

\*C/N ratio = used catalyst weight (g)/4-NP (mol).

## References)

- [1] N. E. Singh-Miller and N. Marzari, *Phys. Rev. B* 2009, **80**, 235407.
- [2] J. L.F. Da Silva, C. Stampfl, M. Scheffler, *Surf. Sci.* 2006, **600**, 703.
- [3] J. W. Arblaster, Crystallographic Properties of Palladium. *Platin. Met. Rev.* 2012, **56**, 181.
- [4] *Introduction to Solid State Physics*, 7<sup>th</sup> ed. (John Wiley & Sons, New York, 1996)
- [5] L. Kaban, I. Kowalec, C. R. A. Catlow and A. J. Logsdail, *Phys. Chem. Chem. Phys.* 2021, **23**, 14649.
- [6] H. Lin, J-X. Liu, H. Fan and W-X. J. Li, *Phys. Chem. C* 2020, **124**, 11005.
- [7] S. Chatterjee, M. Chakraborty, K. K. Bera, A. Mahajan, S. Banik, P. S. Roy and S. K. Bhattacharya, *IOP Conf. Ser. Mater. Sci. Eng.*, 2021, **1080**, 012010.
- [8] Y. Feng, J. Yin, S. Liu, Y. Wang, B. Li and T. Jiao, *ACS Omega* **5**, 3725–3733 (2020).
- [9] Y. Wang, Z. Bi, X. Zhao, A. Abdukayum, S. Zhou, H. Zhang, J. Chen, F. Tan, A. Chen, T. Wågberg and G. Hu, *Molecular Catalysis* 2022, **529**, 112543.
- [10] H. G. Soğukömeroğulları, Y. Karataş, M. Celebi, M. Gülcan, M. Sönmez and M. Zahmakiran, *J. Hazard. Mater.* 2019, **369**, 96.
- [11] F. Han, C. Hu, X. Zhang, C. Jing, T. Hu and X. Yang, *Composite Communications* 2021, **23**, 100580.
- [12] S. Chatterjee and S. K. Bhattacharya, *ACS Omega* 2021, **6**, 20746.
- [13] M. A. Mahmoud, F. Saira and M. A. El-Sayed, *Nano Lett.* 2010, **10**, 3764.
